# Supplementary material for: Assessing Net Environmental and Economic Impacts of Urban Forests: An Online Decision Support Tool
Source: MDPI journal article supplement (doi:10.3390/land12010070), 2022-12-26
Supplement: s1 [file s1]

## Supplementary Material 2 – Basic Information about the Decision Support System

Name of Decision Support System:

NBenefit\$

Description:

A web-based prototype decision support system that quantifies the ecosystem services, financial values and externality values generated by nature-based solutions in monetary and biophysical units, aiding professionals in their planning and design.

Developer:

To be provided at the end of the review process

Supported Browsers:

Chrome and Firefox

Source Languages:

R, Python, JavaScript

Software Required:

No specific software is required beyond a web browser

Availability:

<https://mimes.list.lu/v3>

Access to a restricted prototype version is granted using the following credentials:

[bob@example.com](mailto:bob@example.com) Password: [cabbagewhite21](#)

[alice@example.com](mailto:alice@example.com) Password: [monarch21](#)

[medee@example.com](mailto:medee@example.com) Password: [redadmiral21](#)

This version of NBenefit\$ is made available only for demonstration purposes and has very limited functionalities. For readers interested in accessing the full version, please contact us (contact details will be provided after the review process), since the decision support system is in continuous improvement.
