# Supplementary material for: Assessing Net Environmental and Economic Impacts of Urban Forests: An Online Decision Support Tool
Source: MDPI journal article supplement (doi:10.3390/land12010070), 2022-12-26
Supplement: s1 [file s1]

## Readme Supplementary Material 6

This Supplementary Material includes the yearly results of each Archetype for:

- Avoided water run-off (Avoid\_runoff)
- Branch biomass (Branch)
- CO Deposition (CO)
- NO2 Deposition (NO2)
- O3 Deposition (O3)
- PM10 Deposition (PM10)
- Irrigation (Qirrig)
- SO2 Deposition (SO2)
- Total CO2 Stored (Tot C)
- Total evapotranspiration required (Tot\_evtrns)
- Tree replanting (Tree\_Rep)
- Biowaste generated (Waste)

In each excel file there are 48 spreadsheets representing the 48 Archetypes.

In each spreadsheet the aggregated yearly values for each of the 75 replications is provided in the form of columns. After the columns of values for the 75 replications the successive difference in Mean, Standard Deviation and Skewness is calculated for the first 5, 10, 15, 30, 45, 60, 75 (all) replications.

This permits a comparison of the variation of values depending on the number of replications, to understand if enough replications have been applied.
