# Supplementary material for: Assessing Net Environmental and Economic Impacts of Urban Forests: An Online Decision Support Tool
Source: MDPI journal article supplement (doi:10.3390/land12010070), 2022-12-26
Supplement: s1 [file s1]

Supplementary Material 5. Illustrative example of successive difference in mean and standard deviation values for three outputs of Archetype 1, 2, and 48.

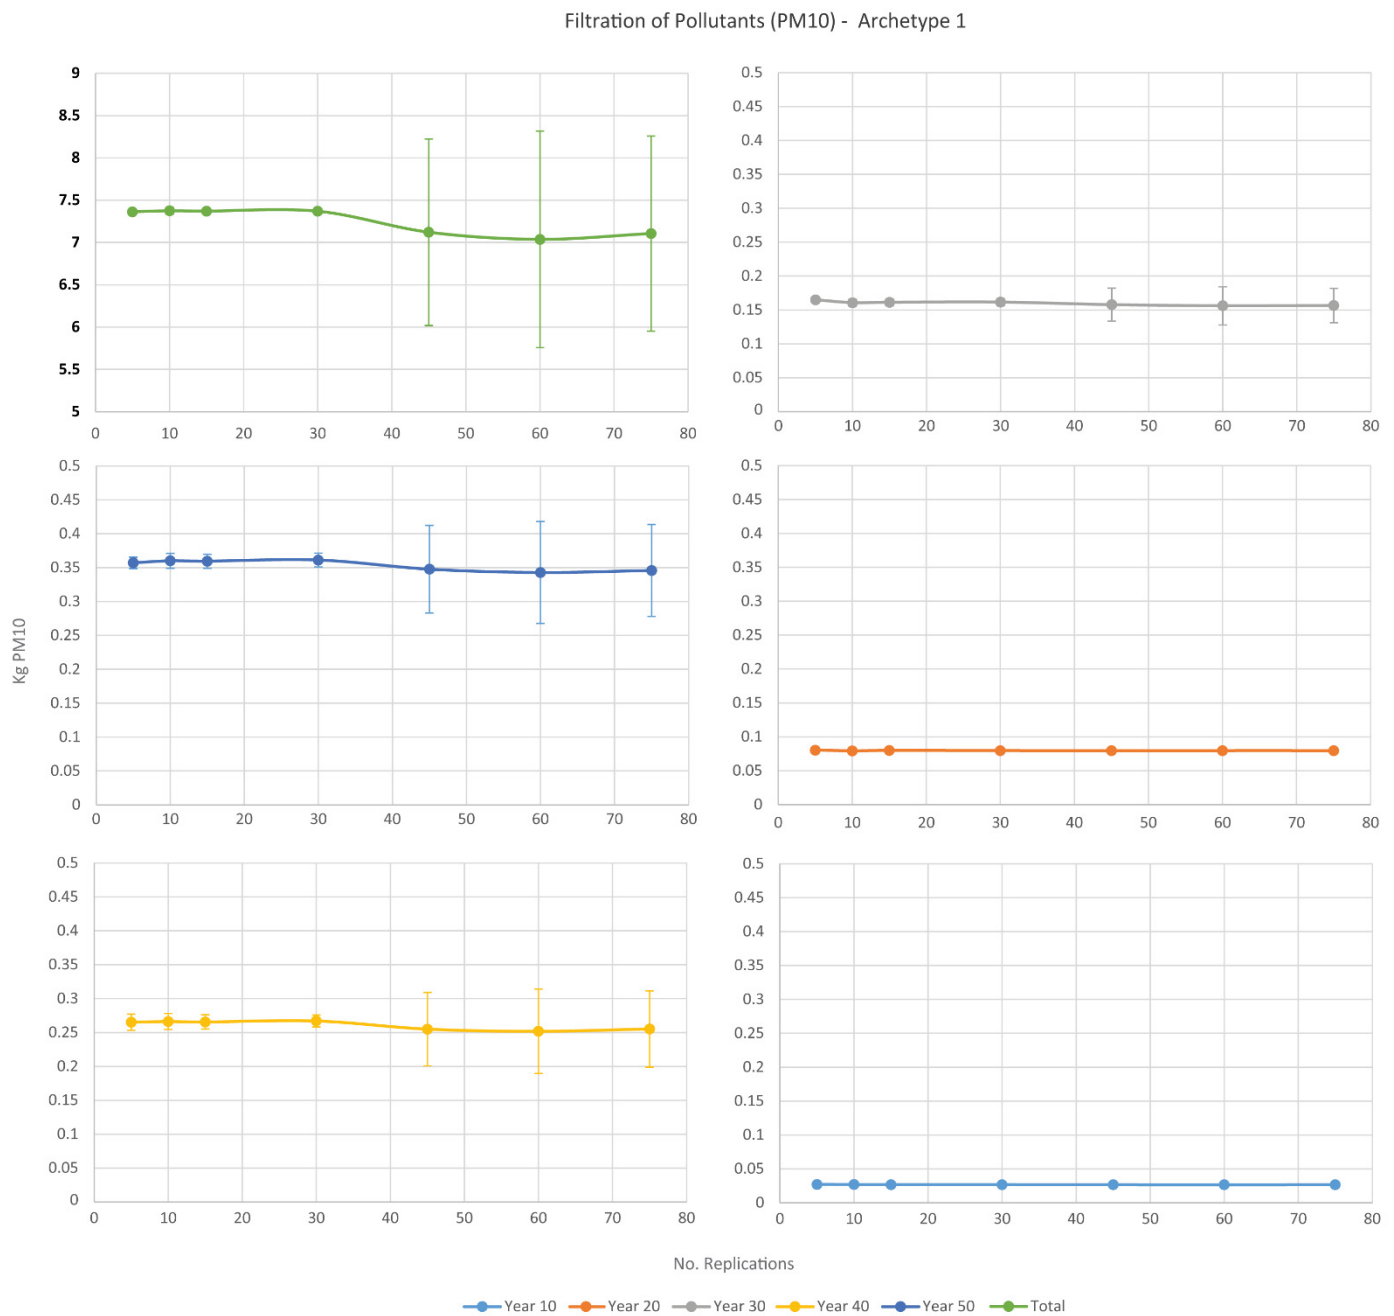

**Figure S4.** Illustrative example of the successive difference in the mean and standard deviation of the yearly outputs and the accumulated (Total) output of Archetype 1 for the ecosystem service *Filtration of Pollutants (PM 10)*. Change in the mean and standard deviation based on 5, 10, 15, 30, 45, 60 and 75 replications are plotted. Numbers of the abscise axis for the accumulated output (Total) are written in bold to help the reader notice that the interval of values differs from the one of yearly outputs.

Filtration of Pollutants (PM10) - Archetype 2

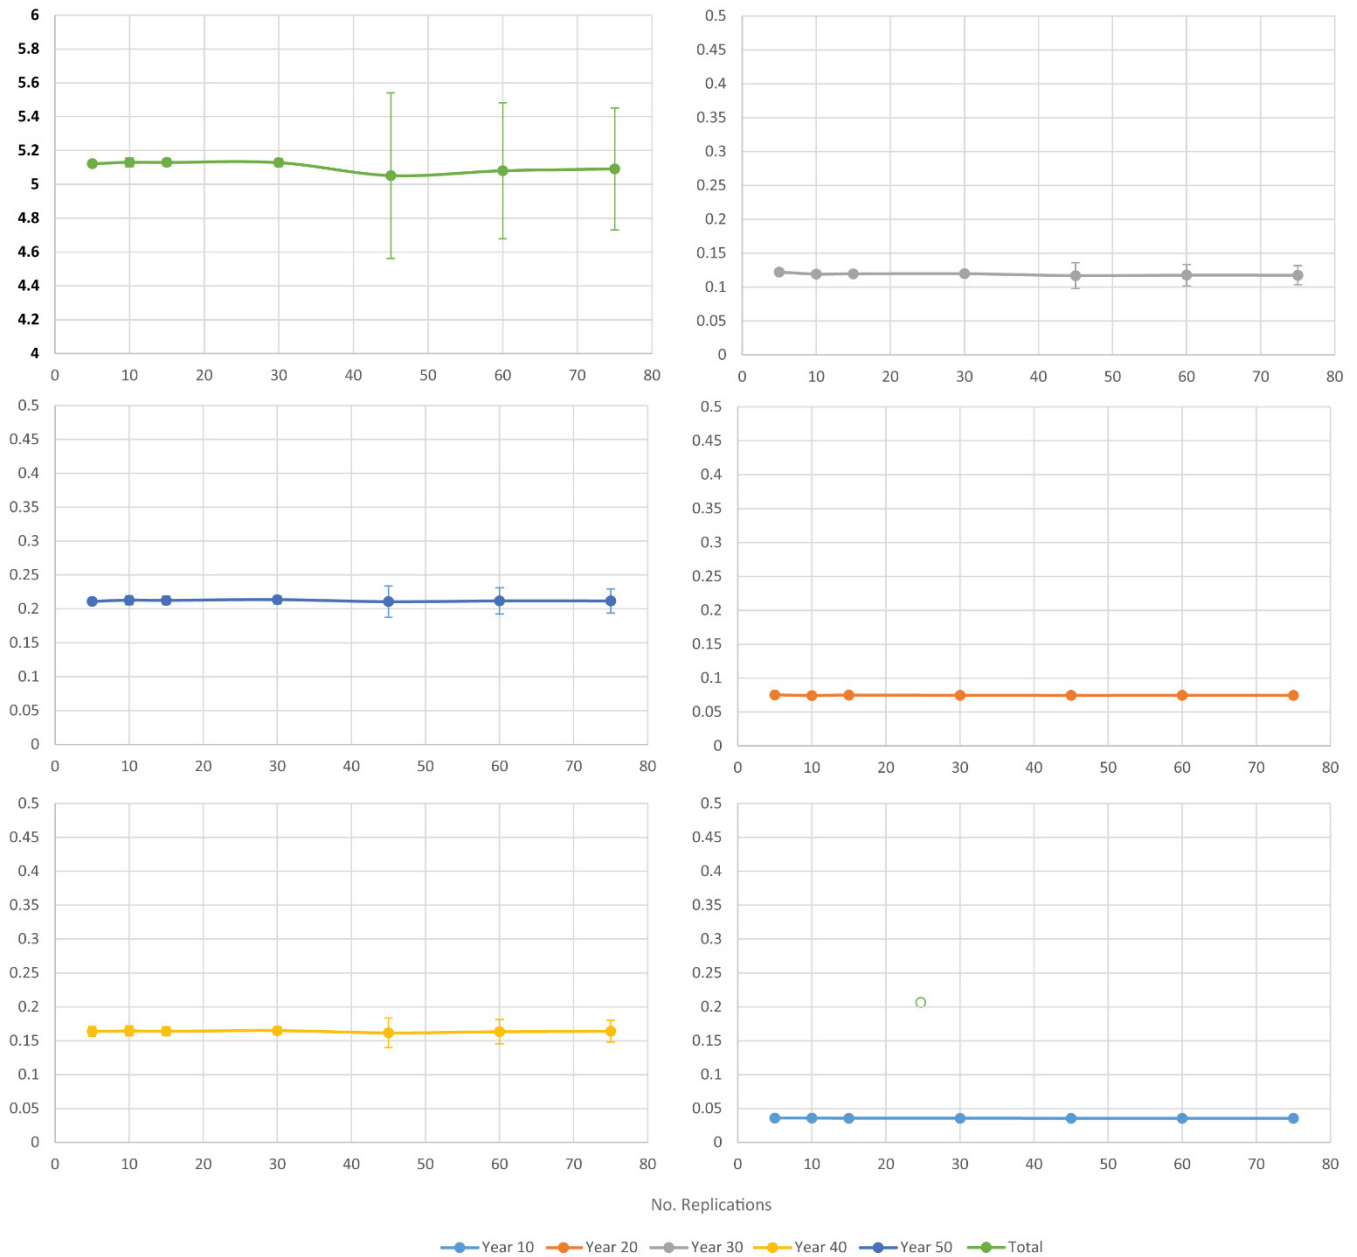

**Figure S5.** Illustrative example of the successive difference in the mean and standard deviation of the yearly outputs and the accumulated (Total) output of Archetype 2 for the ecosystem service *Filtration of Pollutants (PM 10)*. Change in the mean and standard deviation based on 5, 10, 15, 30, 45, 60 and 75 replications are plotted. Numbers of the abscise axis for the accumulated output (Total) are written in bold to help the reader notice that the interval of values differs from the one of yearly outputs.

Filtration of Pollutants (PM10) - Archetype 48

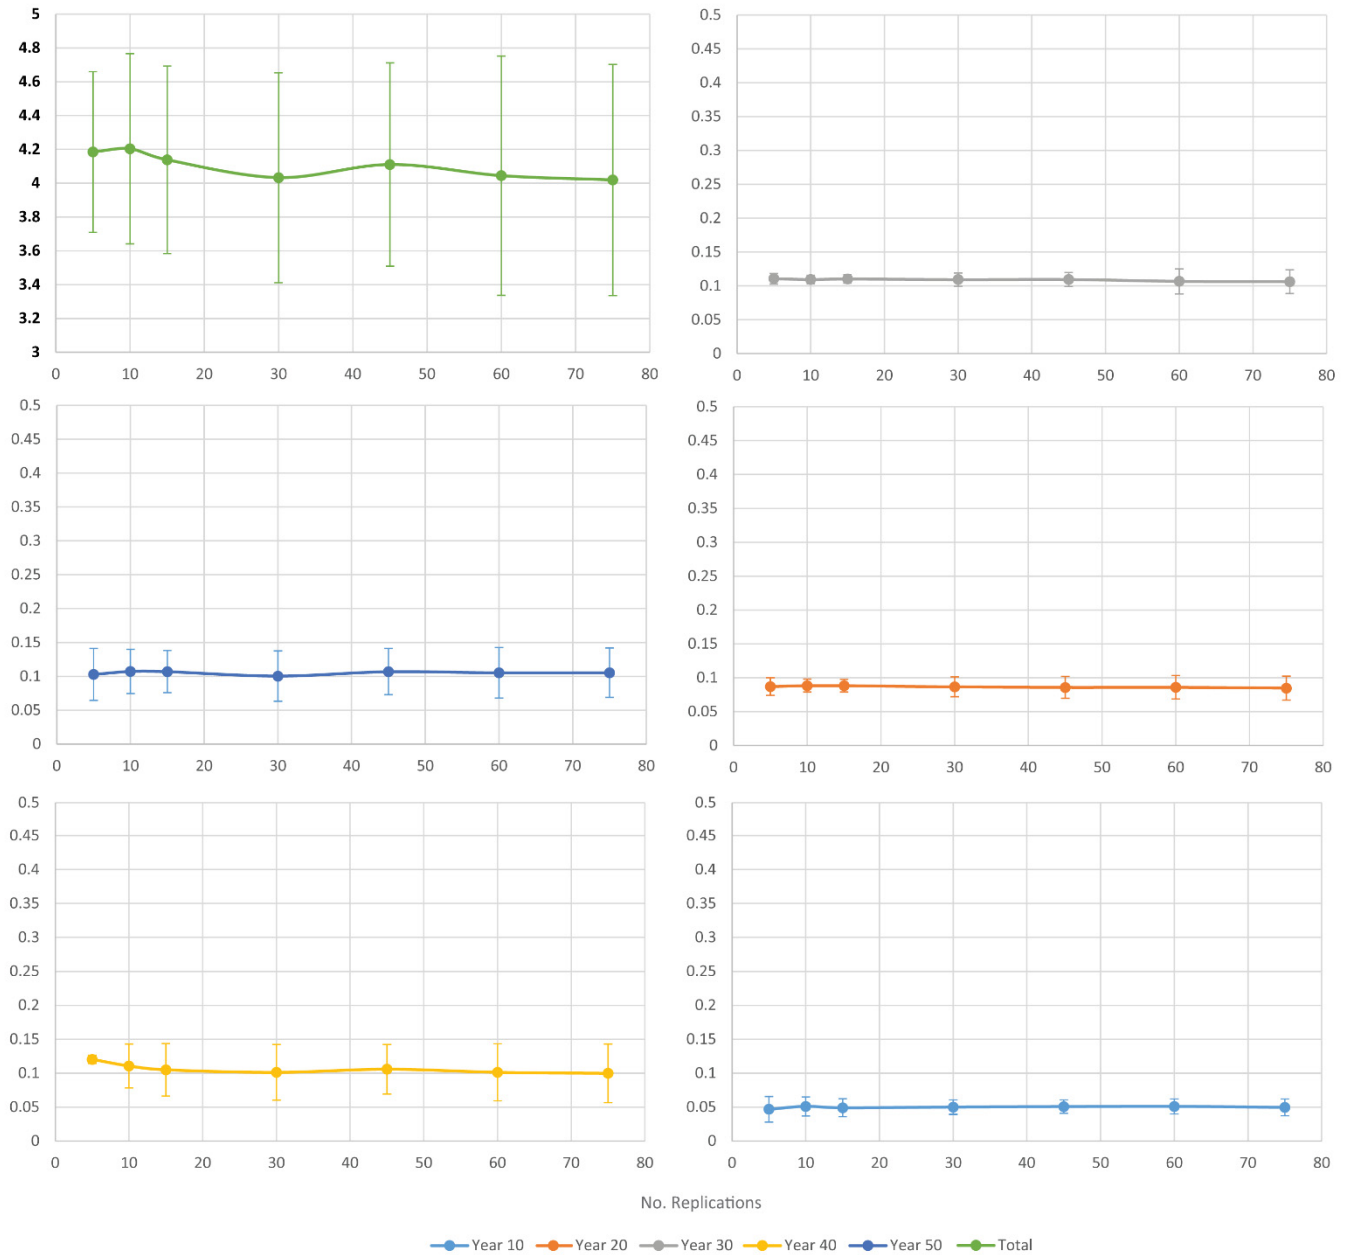

**Figure S6.** Illustrative example of the successive difference in the mean and standard deviation of the yearly outputs and the accumulated (Total) output of Archetype 48 for the ecosystem service *Filtration of Pollutants (PM10)*. Change in the mean and standard deviation based on 5, 10, 15, 30, 45, 60 and 75 replications are plotted. Numbers of the abscise axis for the accumulated output (Total) are written in bold to help the reader notice that the interval of values differs from the one of yearly outputs.

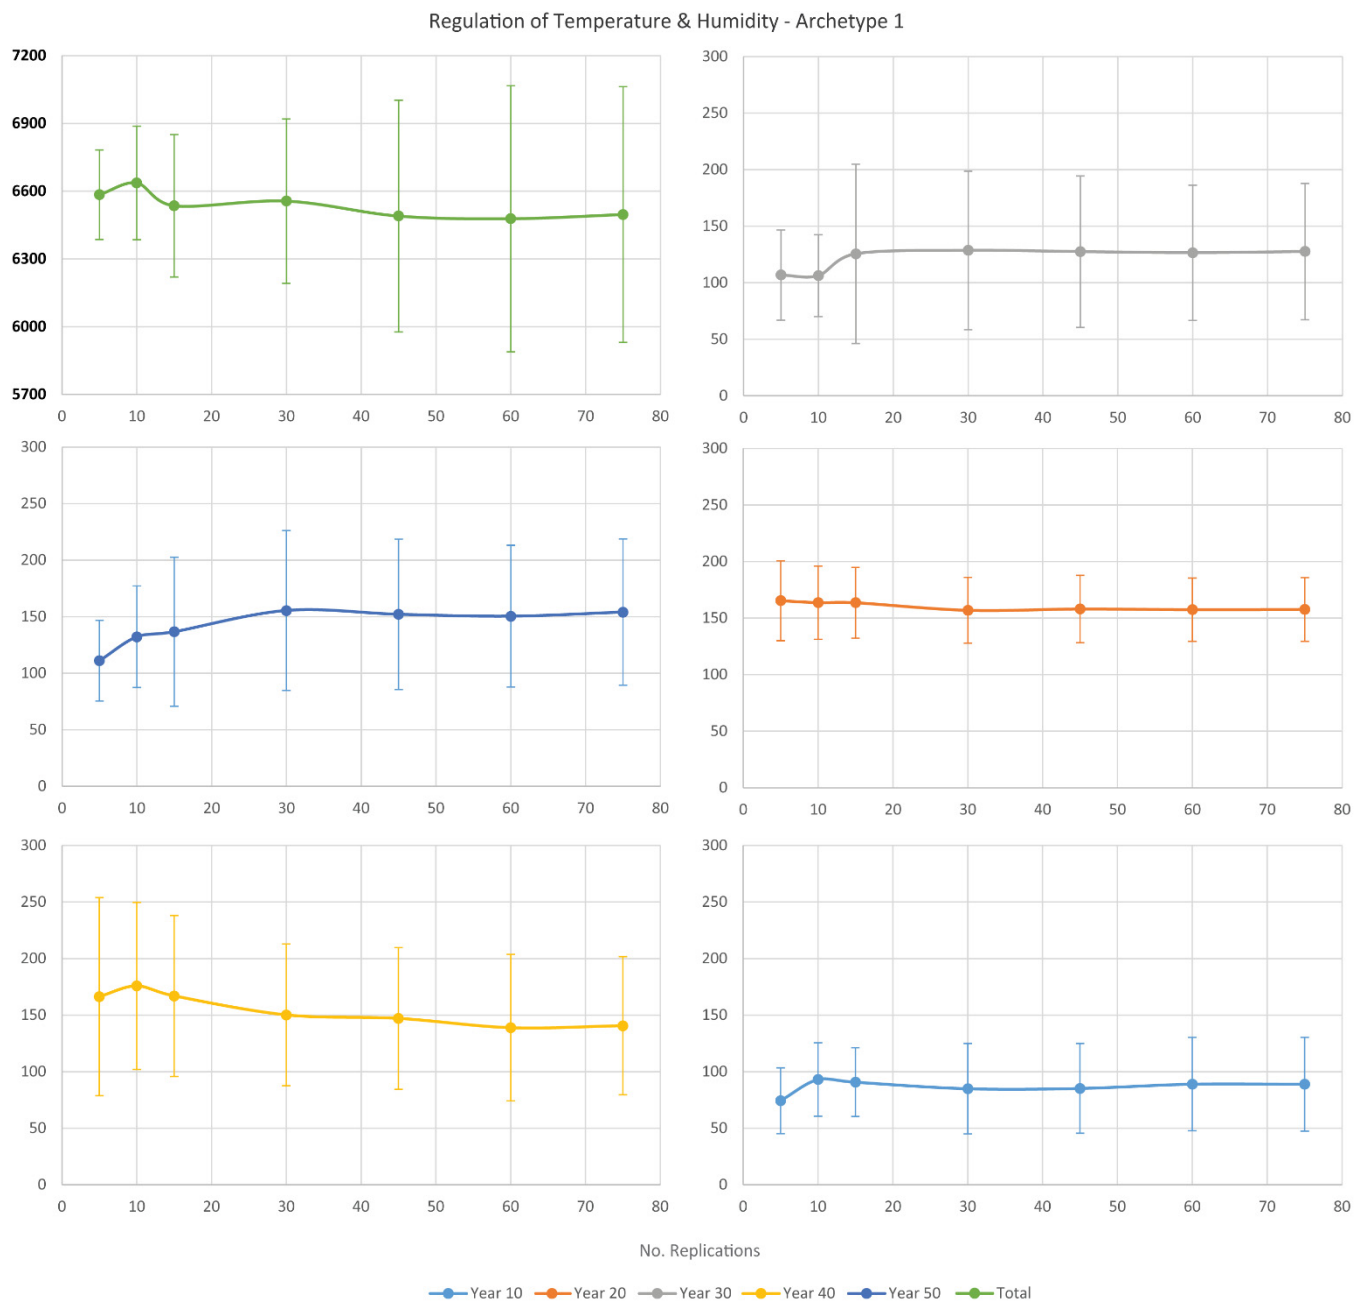

**Figure S7.** Illustrative example of the successive difference in the mean and standard deviation of the yearly outputs and the accumulated (Total) output of Archetype 1 for the ecosystem service *Regulation of Temperature & Humidity*. Change in the mean and standard deviation based on 5, 10, 15, 30, 45, 60 and 75 replications are plotted. Numbers of the abscise axis for the accumulated output (Total) are written in bold to help the reader notice that the interval of values differs from the one of yearly outputs.

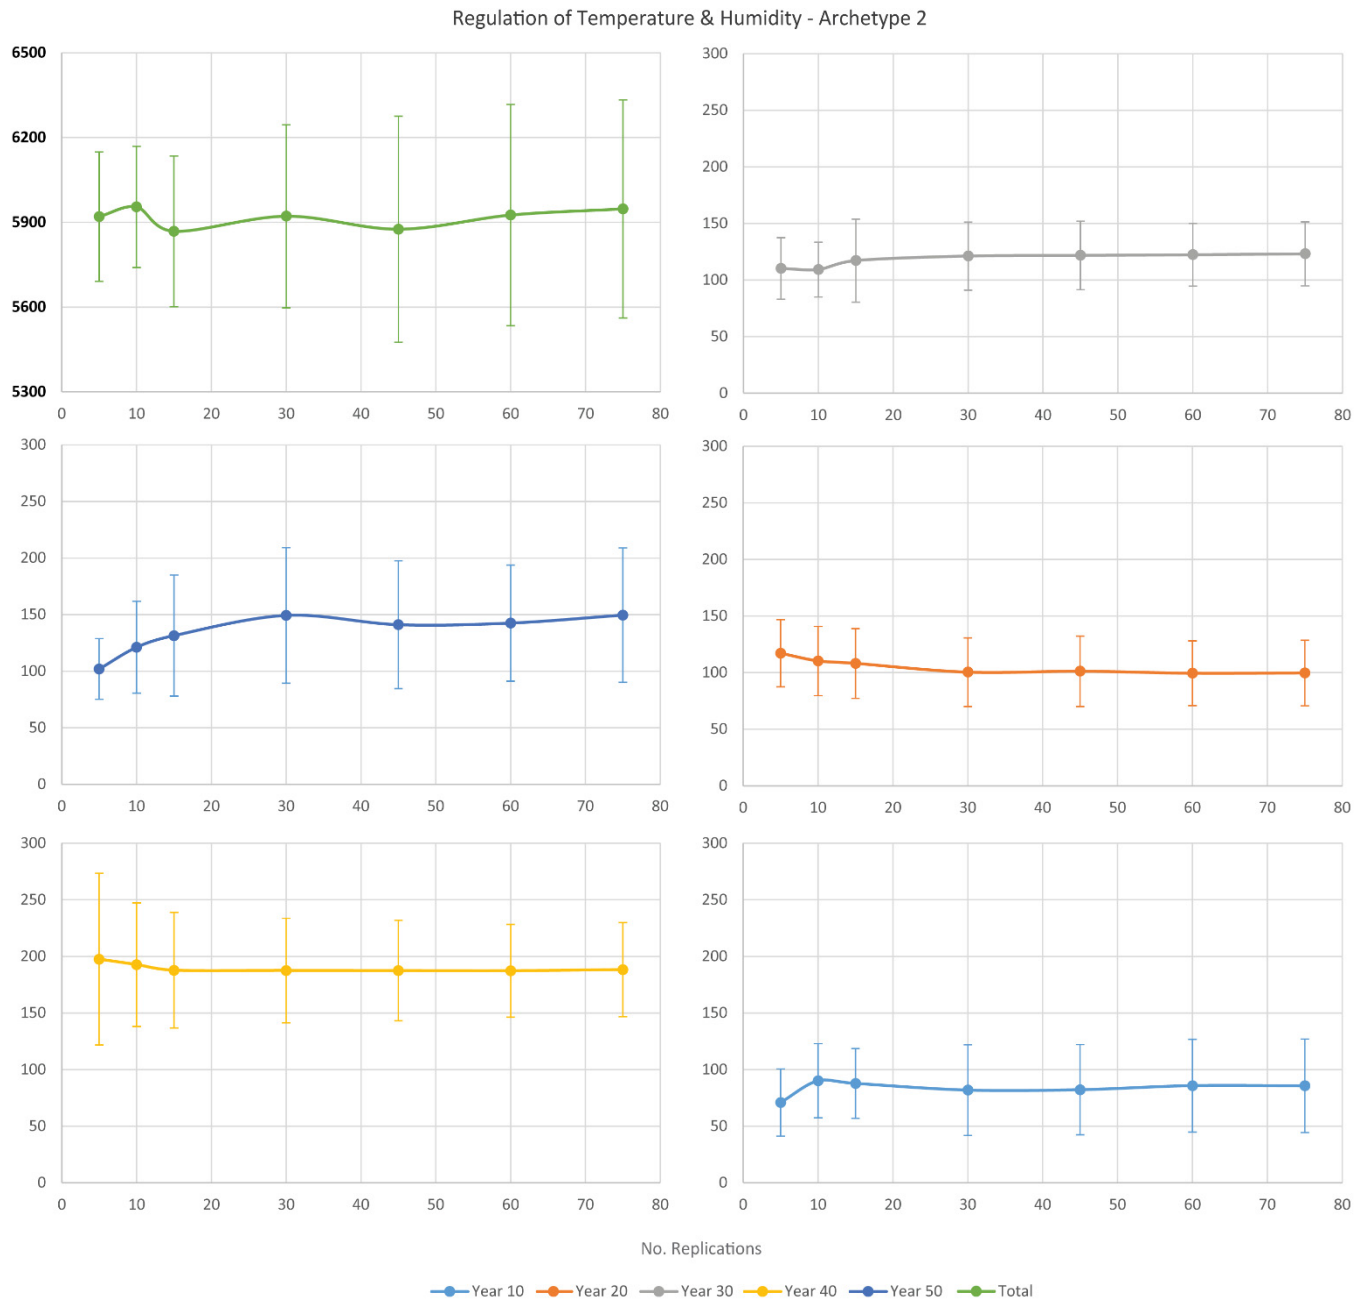

**Figure S8.** Illustrative example of the successive difference in the mean and standard deviation of the yearly outputs and the accumulated (Total) output of Archetype 2 for the ecosystem service *Regulation of Temperature & Humidity*. Change in the mean and standard deviation based on 5, 10, 15, 30, 45, 60 and 75 replications are plotted. Numbers of the abscise axis for the accumulated output (Total) are written in bold to help the reader notice that the interval of values differs from the one of yearly outputs.

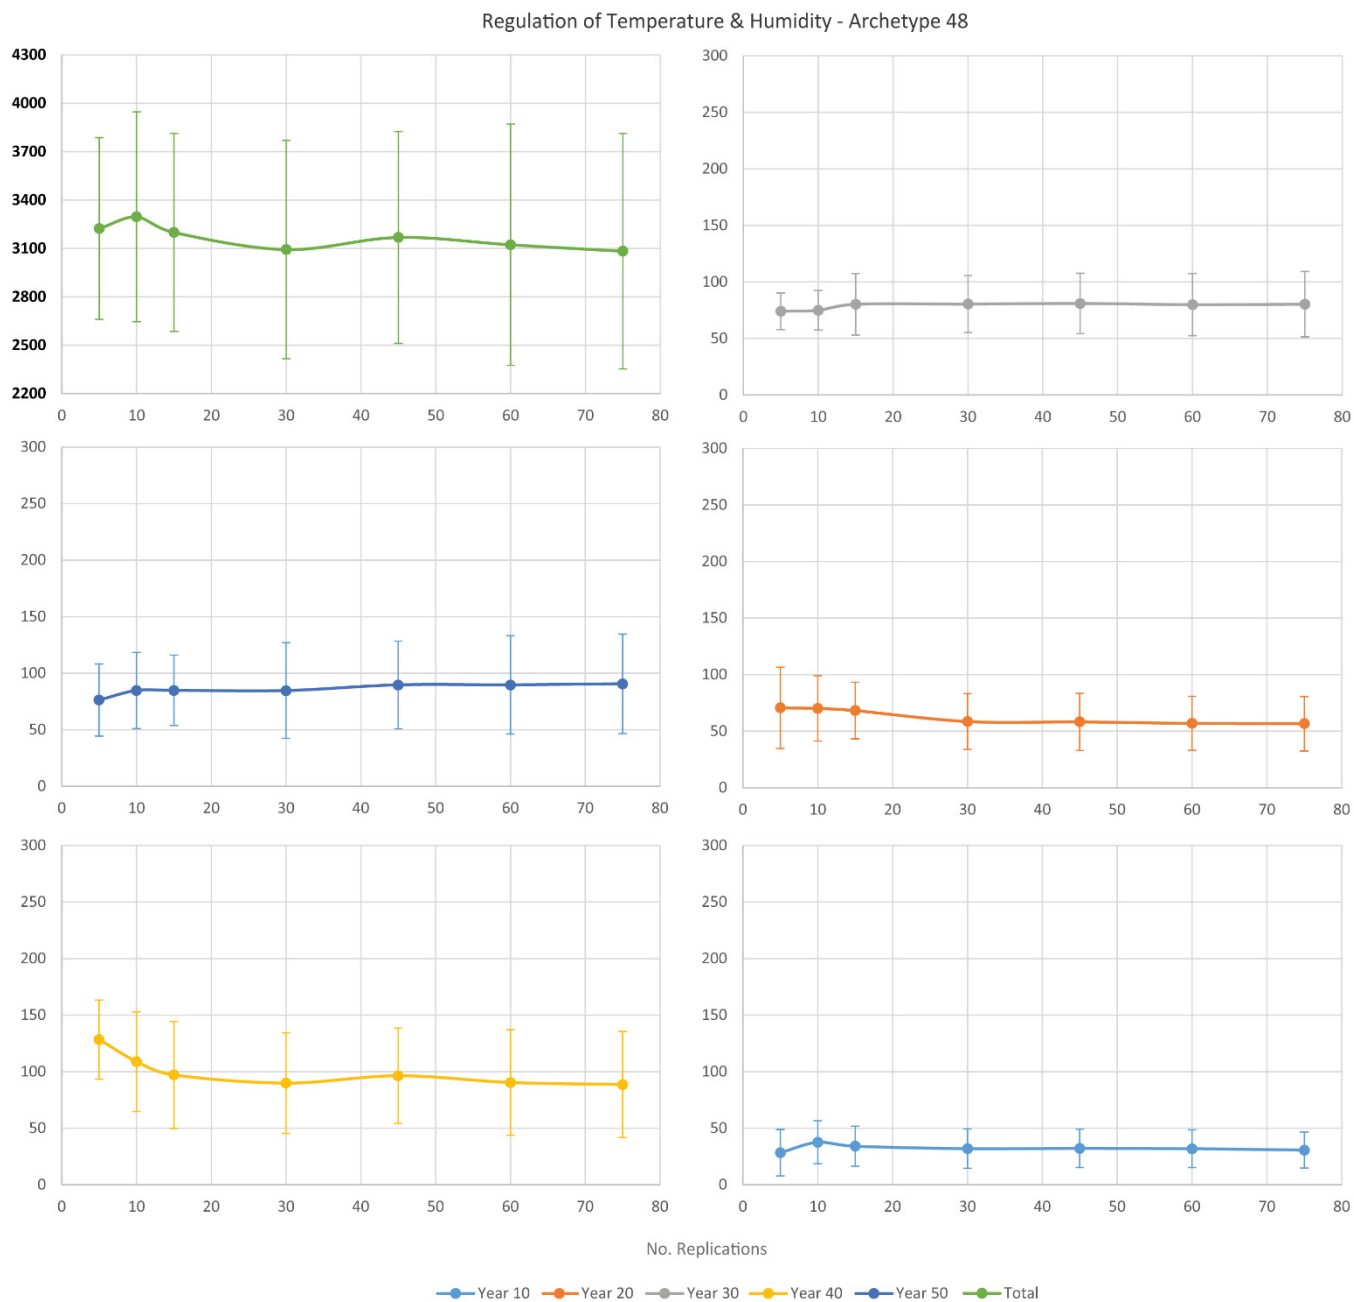

**Figure S9.** Illustrative example of the successive difference in the mean and standard deviation of the yearly outputs and the accumulated (Total) output of Archetype 48 for the ecosystem service *Regulation of Temperature & Humidity*. Change in the mean and standard deviation based on 5, 10, 15, 30, 45, 60 and 75 replications are plotted. Numbers of the abscise axis for the accumulated output (Total) are written in bold to help the reader notice that the interval of values differs from the one of yearly outputs.
